# Supplementary material
Source: MDPI journal article supplement (https://www.mdpi.com/2673-7248/2/3/22)
Supplement: s1 [file s1]

Archive with 3 entries (3 files):
- AJL 2022_Table S1_Exercise studies.pdf
- AJL 2022_Table S2_Recovery studies.pdf
- AJL 2022_Table S3_Combined studies.pdf
